# Supplementary material
Source: PubMed Central journal article supplement (PMC9793959)
Supplement: mmc1.pdf [file mmc1.pdf]

## Supporting Information

### **A DNA biosensors-based microfluidic platform for attomolar real-time detection of unamplified SARS-CoV-2 virus**

Perrine Robin<sup>a,1</sup>, Laura Barnabei<sup>b,1</sup>, Stefano Marocco<sup>c,1</sup>, Jacopo Pagnoncelli<sup>c</sup>, Daniele Nicolis<sup>f</sup>, Chiara Tarantelli<sup>b</sup>, Agatino Christian Tavilla<sup>f</sup>, Roberto Robortella<sup>f</sup>, Luciano Cascione<sup>b</sup>, Lucas Mayoraz<sup>a</sup>, Céline M. A. Journot<sup>a</sup>, Mounir Mensi<sup>d</sup>, Francesco Bertoni<sup>b,e,\*</sup>, Igor Stefanini<sup>c,f,\*</sup>, Sandrine Gerber-Lemaire<sup>a,\*</sup>

<sup>1</sup> Contributed equally to the work

<sup>a</sup> Group for Functionalized Biomaterials, Institute of Chemical Sciences and Engineering, Ecole Polytechnique Fédérale de Lausanne, CH-1015 Lausanne, Switzerland

<sup>b</sup> Institute of Oncology Research, Faculty of Biomedical Sciences, USI, Via Francesco Chiesa 5, CH-6500 Bellinzona, Switzerland

<sup>c</sup> Medical Devices area, Institute of Digital Technologies for Personalized Healthcare - MeDiTech, Department of Innovative Technologies, University of Applied Sciences of Southern Switzerland, Via la Santa 1, CH-6962 Lugano – Viganello, Switzerland

<sup>d</sup> ISIC-XRDSAP, EPFL Valais-Wallis, Rue de l'Industrie 17, CH-1951 Sion, Switzerland

<sup>e</sup> Oncology Institute of Southern Switzerland, Ente Ospedaliero Cantonale, CH-6500 Bellinzona, Switzerland

<sup>f</sup> Department of Innovative Technologies, University of Applied Sciences of Southern Switzerland, Via la Santa 1, CH-6962 Lugano – Viganello, Switzerland

\* Corresponding authors.

[francesco.bertoni@ior.usi.ch](mailto:francesco.bertoni@ior.usi.ch); +41 58 666 72 06 (F. Bertoni)

[igor.stefanini@supsi.ch](mailto:igor.stefanini@supsi.ch); +41 58 666 66 75 (I. Stefanini)

[sandrine.gerber@epfl.ch](mailto:sandrine.gerber@epfl.ch); +41 21 693 93 72 (S. Gerber-Lemaire)

## Table of content

|                                                                                           |     |
|-------------------------------------------------------------------------------------------|-----|
| Specificity of <b>PP1</b> for SARS-CoV-2 virus                                            | S-3 |
| Quantification of ssDNA probe conjugated to SiO <sub>2</sub> -based slides                | S-4 |
| Characterization of functionalized SiO <sub>2</sub> slides by XPS                         | S-5 |
| Assessment of the stability of <b>S-PP1</b> slides                                        | S-7 |
| Conception diagram of the automated SARS-CoV-2 diagnostics platform                       | S-7 |
| Comparison of RNA extraction protocols                                                    | S-8 |
| Evaluation of sensing slides functionalized with the molecular beacon <b>MB-PP1</b> probe | S-9 |

## Specificity of PP1 for SARS-CoV-2 virus

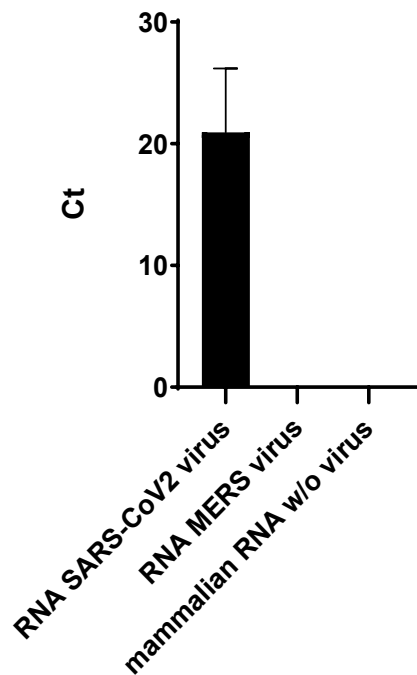

**Figure S1.** Specific amplification of RNA from SARS-CoV-2 positive sample and not from SARS-CoV-2 negative samples. The primers used to perform the qPCR were: 5' TGAAGCAAGGTGAAATCAAGGA 3' and 5' AACAGCAAGAAGTGCAACGCCAAC 3' (as probe **PP1**).

## Quantification of immobilized ssDNA probe on functionalized SiO<sub>2</sub> slides

| Slide                            | S-PP1                                            | S-Suc (negative control)            |
|----------------------------------|--------------------------------------------------|-------------------------------------|
| DNA amount quantified (per face) | 2.90 pmol<br>1.94 pmol<br>2.46 pmol<br>3.57 pmol | 0.11 pmol<br>0.21 pmol<br>0.00 pmol |
| <b>Average</b>                   | <b>2.7 ± 0.7 pmol</b>                            | <b>0.10 ± 0.10 pmol</b>             |

**Table S1.** Quantity of surface-immobilized ssDNA probe on **S-PP1** and **S-Suc** slides.

| Name          | Sequence                         |
|---------------|----------------------------------|
| PP1           | 5'AmMC6-AACAGCAAGAAGTGCAACGCCAAC |
| Cy3-comp. PP1 | 5'Cy3-GTTGGCGTTGCACTTCTTGCTGTT   |

**Table S2.** DNA sequences corresponding to PP1 and 5'-Cy3-labelled complementary DNA strand.

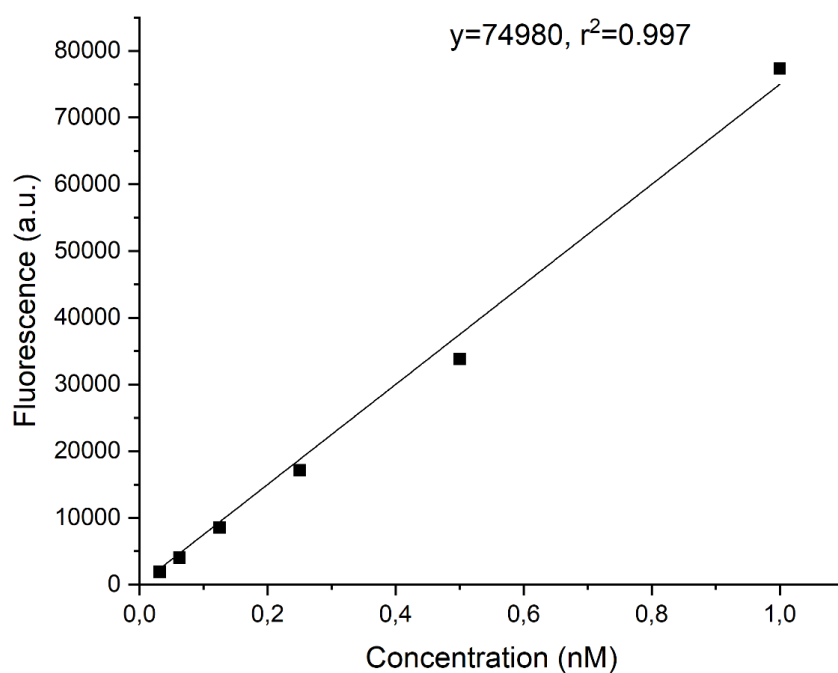

**Figure S2.** Representative standard curve for the quantification of Cy3-complementary **PP1** strand liberated from a surface.

## Characterization of functionalized SiO<sub>2</sub> slides by XPS

| Slides            | Si at% | C at% | N at% | P at% |
|-------------------|--------|-------|-------|-------|
| S-NH <sub>2</sub> | 42.48  | 49.15 | 8.37  | 0.00  |
| S-Suc             | 39.32  | 52.62 | 8.06  | 0.00  |
| S-PP1             | 38.77  | 54.08 | 6.86  | 0.30  |

**Table S3.** Surface relative atomic concentration of C, N, O and S detected via XPS for amino-modified slides **S-NH<sub>2</sub>**, succinic-modified slides **S-Suc** and DNA-functionalized slides **S-PP1**.

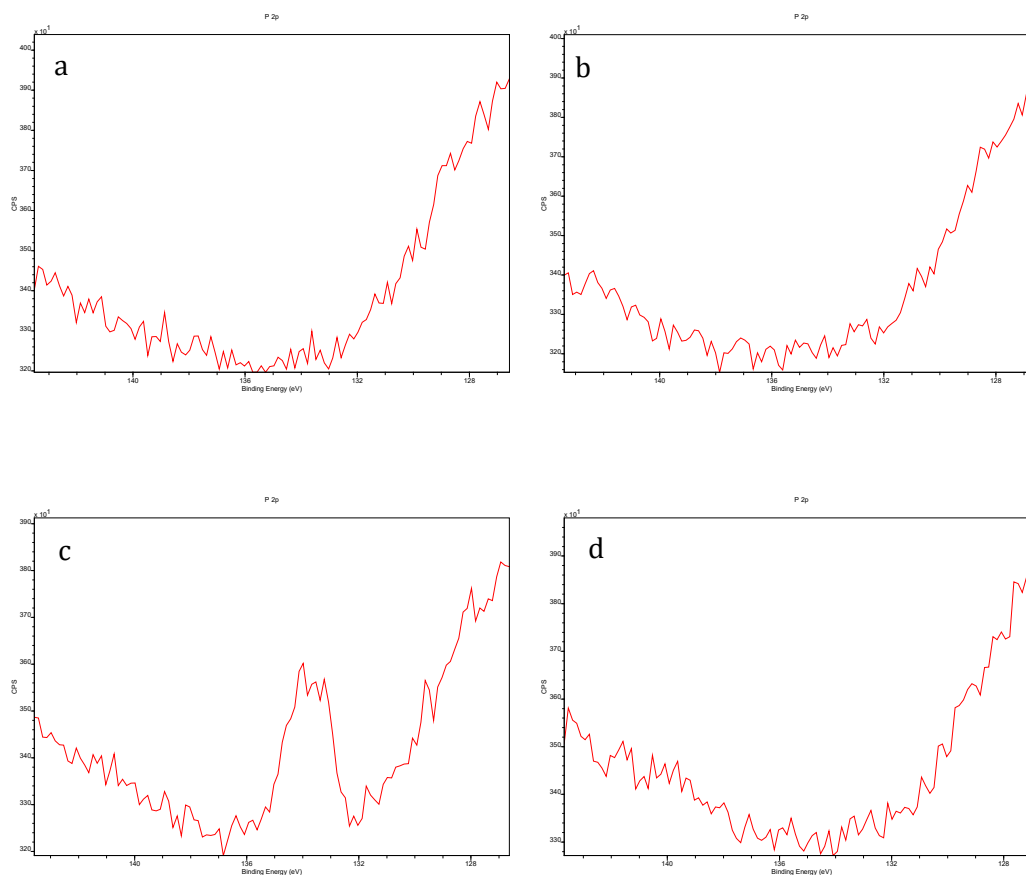

**Figure S3.** XPS spectra of P 2p region of (a) amino-modified slides **S-NH<sub>2</sub>**; (b) **S-Suc** slides; (c) DNA-functionalized slides **S-PP1**; (d) **S-Suc** slides incubated with **PP1** probes without coupling agent.

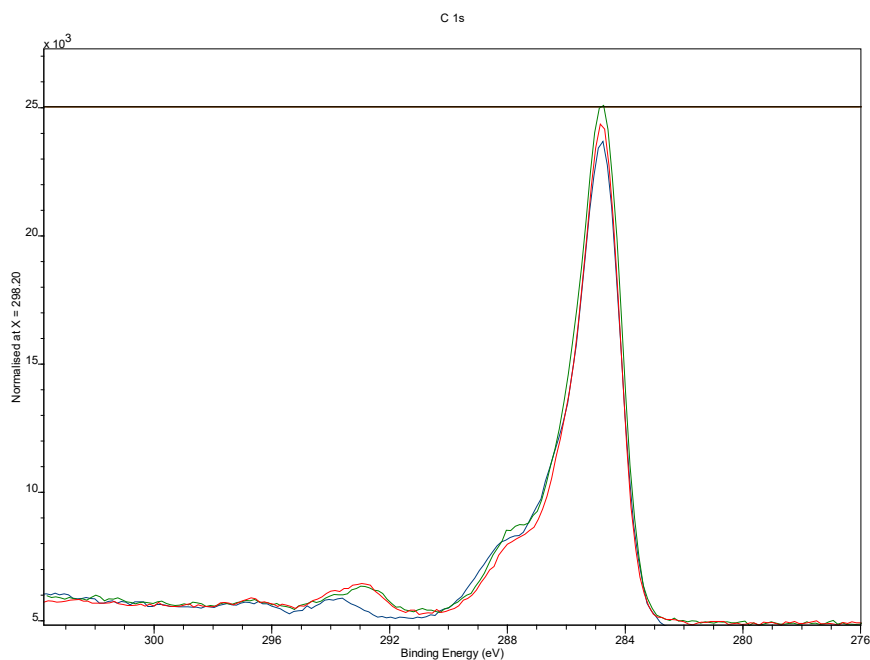

**Figure S4.** XPS spectra of C 1s region of amino-modified slides **S-NH<sub>2</sub>** (red), succinic-modified slides **S-Suc** (green) and DNA-functionalized slides **S-PP1** (blue). Normalized at 298.20eV.

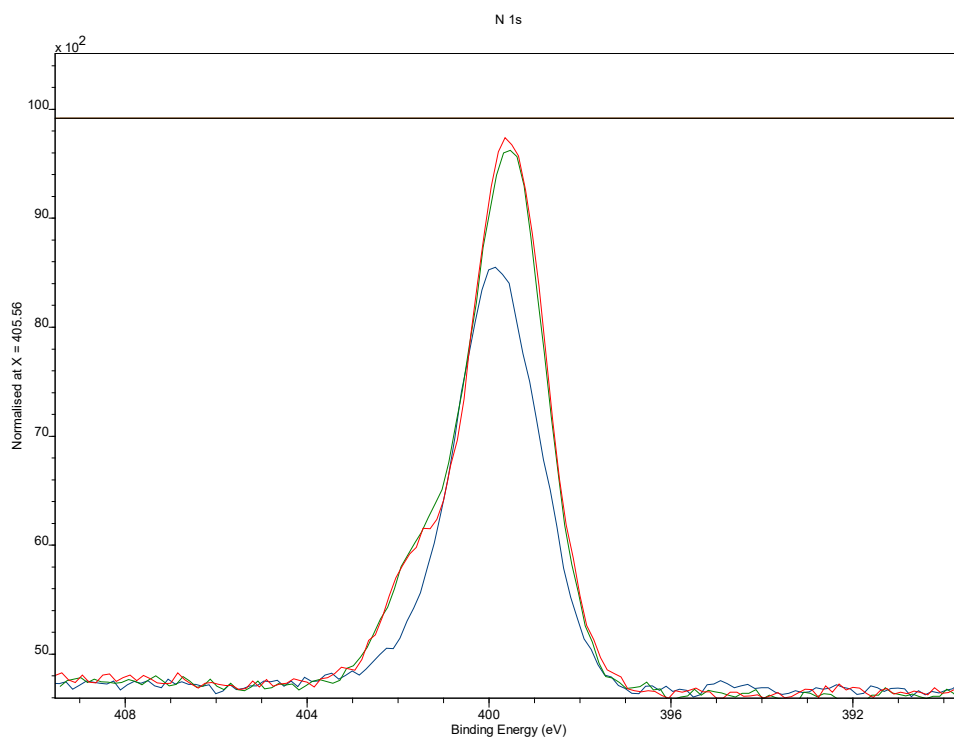

**Figure S5.** XPS spectra of N 1s region of amino-modified slides **S-NH<sub>2</sub>** (red), succinic-modified slides **S-Suc** (green) and DNA-functionalized slides **S-PP1** (blue). Normalized at 405.56eV

### Assessment of the stability of S-PP1 slides

| Storage conditions                                | SSC 4X     | MiliQ       | Tris.HCl 1M | PBS 1X      | Dried without solvent | Dried with solvents |
|---------------------------------------------------|------------|-------------|-------------|-------------|-----------------------|---------------------|
| DNA density (pmol/cm <sup>2</sup> ) After 10 days | 3.07 ± 0.3 | 2.25 ± 0.78 | 3.89 ± 0.43 | 3.00 ± 0.53 | 2.52 ± 0.13           | 1.50 ± 0.2          |
| DNA density (pmol/cm <sup>2</sup> ) After 15 days | /          | 2.55 ± 0.71 | /           | /           | /                     | /                   |
| DNA density (pmol/cm <sup>2</sup> ) After 20 days | /          | 2.63 ± 0.62 | /           | /           | /                     | /                   |

**Table S4.** Quantification of surface immobilized **PP1** DNA probe on **S-PP1** slides after 10 days of storage at 4°C in different media. Quantification of surface immobilized **PP1** DNA probe on **S-PP1** slides after 15 and 20 days of storage at 4°C in MilliQ. Values are expressed as mean ± standard deviation (triplicate).

### Conception diagram of the automated SARS-CoV-2 diagnostics platform

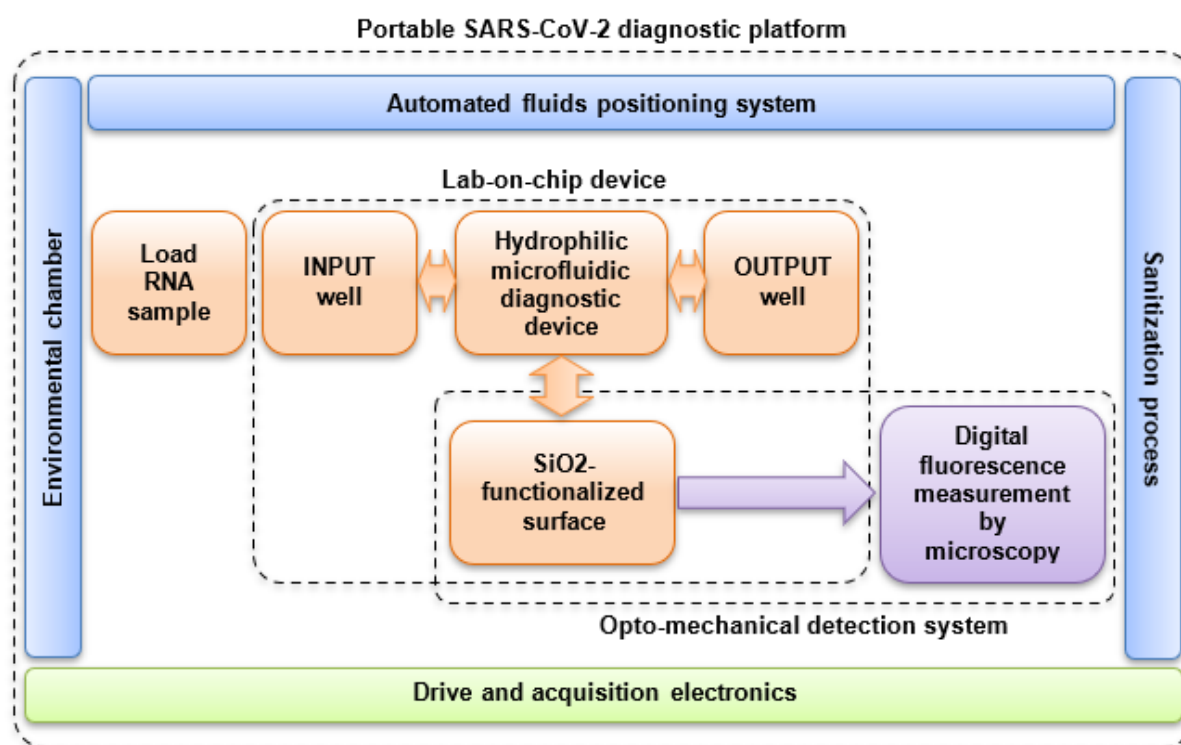

**Figure S6.** Main block diagram of the automatic device for viral screening via DNA-based biosensors.

## Comparison of RNA extraction protocols

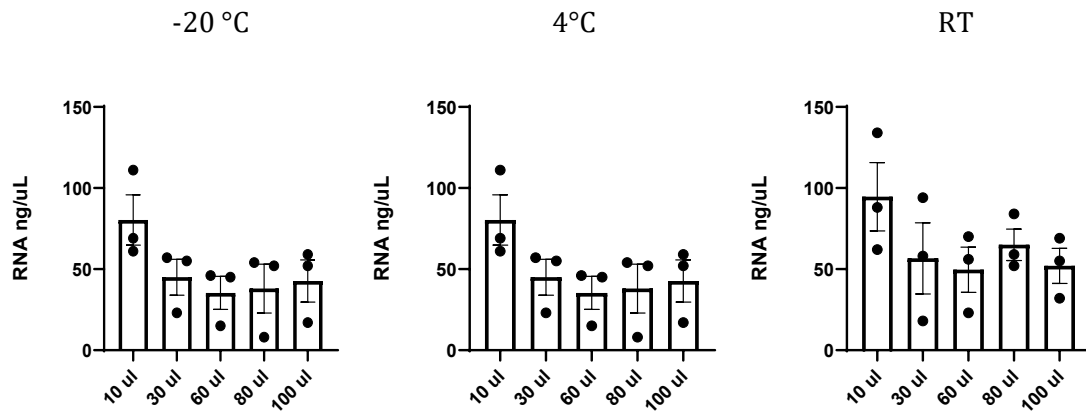

**Figure S7.** RNA extraction performed using different concentration of human saliva mixed with Lucigen Quick Extract DNA kit (1:1). No significant difference was observed keeping the kit at -20°C (as manufacturer's instruction), 4°C or RT.



## Evaluation of sensing slides functionalized with the molecular beacon MB-PP1 probe

| Name   | Sequence                                                                                       |
|--------|------------------------------------------------------------------------------------------------|
| MB-PP1 | 5'AmMC6-TT TTT TTT TTT TT-FAM- TGA CGG<br>AAC AGC AAG AAG TGC AAC GCC AAC CCG<br>TCA-DABCYL-3' |

**Table S5.** DNA sequence corresponding to **MB-PP1**. DABCYL: N-[4-(4-dimethylamino)phenylazo]benzoic acid; FAM: Carboxyfluorescein. The FAM fluorophore was internally integrated to the probe through click chemistry.

| Slide                            | S-MB-PP1               | S-Suc (negative control) |
|----------------------------------|------------------------|--------------------------|
| DNA amount quantified (per face) | 5.42 pmol<br>3.67 pmol | 0.73 pmol<br>0.00 pmol   |
| Average                          | 4.5 ± 0.9 pmol         | 0.37 ± 0.52 pmol         |

**Table S6.** Quantity of surface-immobilized **MB-PP1** probes on **S-MB-PP1** and **S-Suc** slides

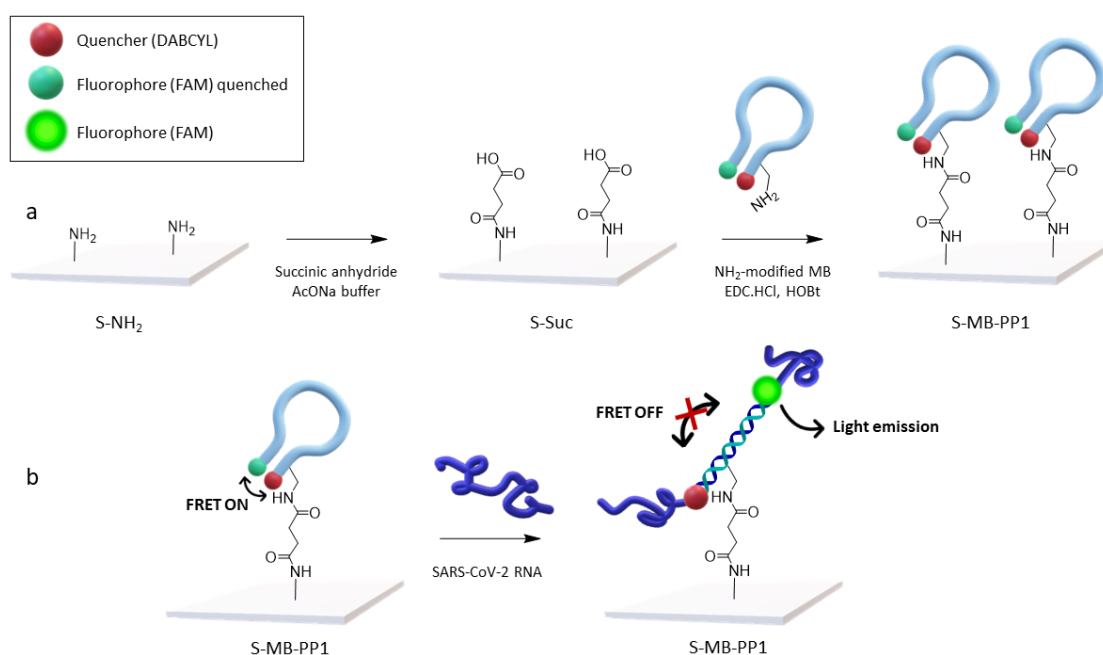

**Scheme S1.** a: Conjugation of **MB-PP1** probes to the surface of sensing slides. b: Principle of SARS-CoV-2 RNA detection with **S-MB-PP1** slides. DABCYL: N-[4-(4-dimethylamino)phenylazo]benzoic acid; FAM: Carboxyfluorescein; FRET: Fluorescence Resonance Energy Transfer.

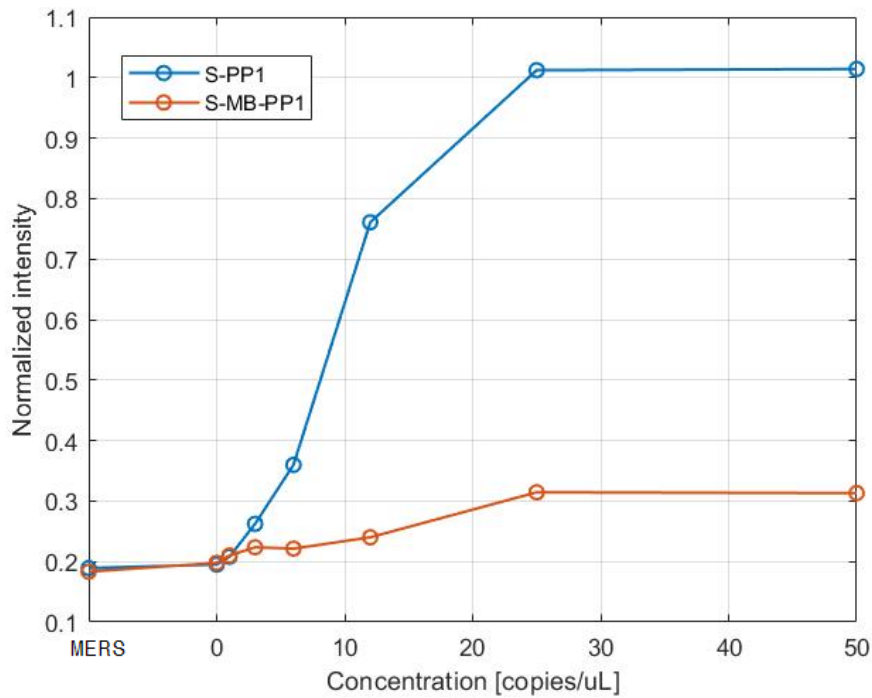

**Figure S8.** Comparison of the sensing properties of **S-PP1** and **S-MB-PP1** slides. Light intensities emitted by SYBR Green I (**S-PP1** samples) and carboxyfluorescein (**S-MB-PP1** samples) were converted by the PMT and normalized by subtraction of baseline values (**S-PP1** slides with SYBR Green I only or **S-MB-PP1** slides). **S-PP1** and **S-MB-PP1** were incubated with saliva samples containing SARS-CoV-2 virus at concentrations of 50, 25, 12, 6, 3, 1 copies/μL or MERS virus at a concentration of 50 copies/μL.

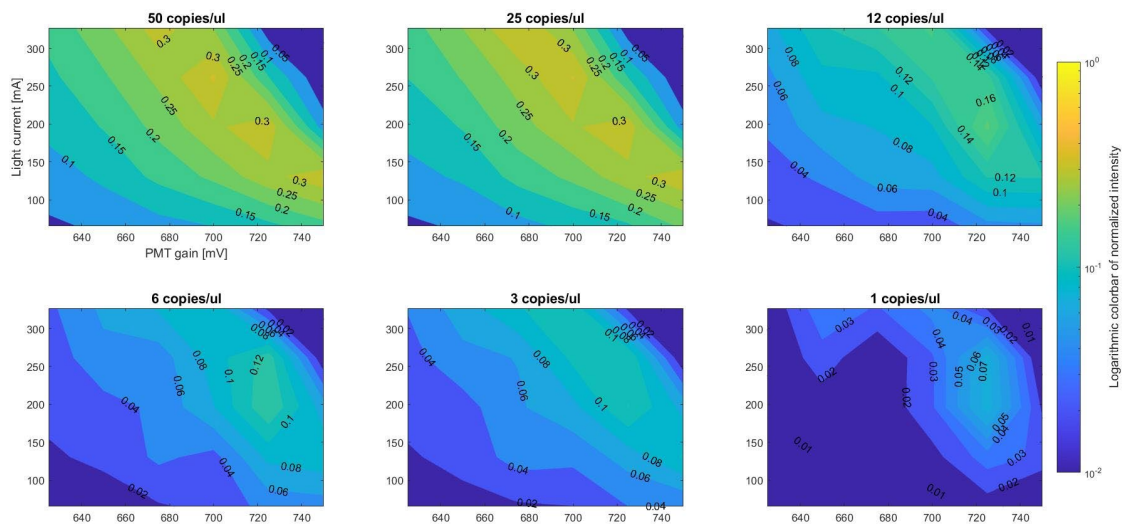

**Figure S9.** Difference between **S-MB-PP1** samples and baseline at decreasing SARS-CoV-2 viral loads (50, 25, 12, 6, 3, 1 copies/μL) represented as logarithmic colorbars of normalized intensities over LED current intensity (mA) and PMT gain (mV).
